# Supplementary material for: Catechin and Procyanidin B2 Modulate the Expression of Tight Junction Proteins but Do Not Protect from Inflammation-Induced Changes in Permeability in Human Intestinal Cell Monolayers
Source: PubMed Central journal article supplement (PMC6836206; doi:10.3390/nu11102271), 2019-09-21
Supplement: nutrients-11-02271-s001.pdf [file nutrients-11-02271-s001.pdf]

1 Article

2 **Catechin and Procyanidin B2 Modulate the**  
 3 **Expression of Tight Junction Proteins but do not**  
 4 **Protect from Inflammation-induced Changes in**  
 5 **Permeability in Human Intestinal Cell Monolayers**

6 Massimiliano G. Bianchi <sup>1</sup>, Martina Chiu <sup>1</sup>, Giuseppe Taurino <sup>1</sup>, Furio Brighenti <sup>2</sup>, Daniele Del Rio  
 7 <sup>3,4,5\*</sup>, Pedro Mena <sup>2,3</sup> and Ovidio Bussolati <sup>1,4,\*</sup>

8

9 Supplementary Material

10

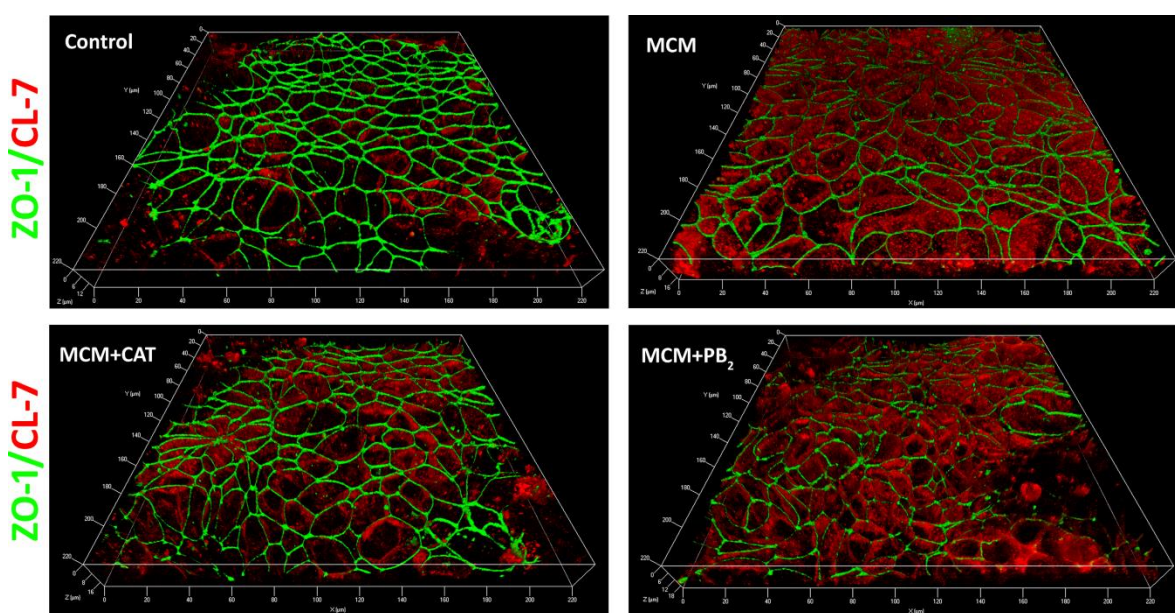

11

12

13 **Figure S1.** Distribution of ZO-1 and CL-7 in Caco-2/HT29-MTX monolayers. Reconstructions were performed  
 14 from z-stacks of digital images (minimum 40 confocal sections, z-axis acquisition interval of 0.38 µm) taken  
 15 during the experiment shown in Figure 3. The images were processed with the Axiovision module inside 4D  
 16 release 4.5 (Carl Zeiss, Jena, Germany), applying the transparency algorithm. See the legend to Figure 3 for  
 17 further information. Claudin-7, red; ZO-1, green.
